# Supplementary material for: A Transcription Factor SlNAC4 Gene of Suaeda liaotungensis Enhances Salt and Drought Tolerance through Regulating ABA Synthesis
Source: MDPI journal article supplement (doi:10.3390/plants12162951), 2023-08-15
Supplement: s1 [file s1]

**Table S1.** The primers sequences used for *SINAC4* study.

| Primer name     | Primer sequence                       |
|-----------------|---------------------------------------|
| EST-F           | 5'-CGAGTTTCAGCATCTGGGT-3'             |
| EST-R           | 5'-GAGCACGCCCTTG ATAGA-3'             |
| SINAC4-3'-Outer | 5'-GGTGAATAAGTGGGGG GGAT-3'           |
| SINAC4-3'-Inner | 5'-GAAAAGGAAGGTTGAAGGGC-3'            |
| SINAC4-F        | 5'-CATTCTGTGGGGGTTATTTG-3'            |
| SINAC4-R        | 5'-CCCTTACAAAGTTACAATGG-3'            |
| SINAC4-qF       | 5'-GAAAAGAAAGGTTGAAGGGCTAGA-3'        |
| SINAC4-qR       | 5'-ATCCCTTGGACAGAGAAAGAACC-3'         |
| SlActin-qF      | 5'-ATCCCAAGGCTAA TCGTGAAAA-3'         |
| SlActin-qr      | 5'-CACCATCACCAGAGTCCAACA-3'           |
| AtABA1-qF       | 5'-ACTTAGGTGTTGGGCTTGGT-3'            |
| AtABA1-qR       | 5'-CGGCTTTGTGAGTGAGTCTG-3'            |
| AtABA3-qF       | 5'-CGTCGTCAGTGGAAGGTTTC-3'            |
| AtABA3-qR       | 5'-AATTTACCGGTCAGACCCT-3'             |
| AtNCED3-qF      | 5'-TCTCCGGTGGTTTACGACAA-3'            |
| AtNCED3-qR      | 5'-GGACCCTATCACGACGACTT-3'            |
| AtAAO3-qF       | 5'-ACAAGGCACTTGGGACTACA-3'            |
| AtAAO3-qR       | 5'-GGAATGTTTCCGAGCTTCCC-3'            |
| AtCYP707A3-qF   | 5'-AAAGCCATGAAAGCTCGCAA-3'            |
| AtCYP707A3-qR   | 5'-CTTGCGGCGAAGATTACTCC-3'            |
| Atactin-qF      | 5'-CGAGGCTCCTCTTAACCCAA-3'            |
| Atactin-qR      | 5'-ACCATCACCAGAATCCAGCA-3'            |
| AtABA1-F        | 5'-cgagctcGCTCTAGCCTCTAGGCTATGGGT     |
| AtABA1-R        | 5'-ccctcgagGTGACGTGATCAGCGCTTGTG      |
| AtABA3-F        | 5'-ggggtaccCAAACCCGAATAGGTATCCAAAC    |
| AtABA3-R        | 5'-ccctcgagACAATTTTCGTTTTCCACGTAAGT   |
| AtNCED3-F       | 5'-ggggtaccACATATCCAAAAGTGACGATGA     |
| AtNCED3-R       | 5'-gcgtcgacACCGTTGTAAGATGAAGTTAAGTGTA |
| AtAAO3-F        | 5'-cgagctcATGTGAAAGCTGTAGACTCGTTCG    |

|              |                                         |
|--------------|-----------------------------------------|
| AtAAO3-R     | 5'-ccctcgagTCATTGACTGTGCGCCACGAGT       |
| AtCYP707A3-F | 5'-ggggtaccAGTCTTTGGTCCTAGATCCCTCAAG    |
| AtCYP707A3-R | 5'-ccctcgagAGGCAGTGGAGGAGAGAGAAG        |
| SINAC4-F     | 5'-cggaattcATGGGAGCTGCAACTTTG           |
| SINAC4-R     | 5'-ccctcgagTCAGAAGGGATTTTGATAGCTAAGAGTA |
